# Supplementary material for: Assessment of Potential Toxicity of Onion-like Carbon Nanoparticles from Grilled Turbot Scophthalmus maximus L.
Source: MDPI journal article supplement (doi:10.3390/foods11010095), 2021-12-30
Supplement: s1 [file s1]

## Supplementary Material

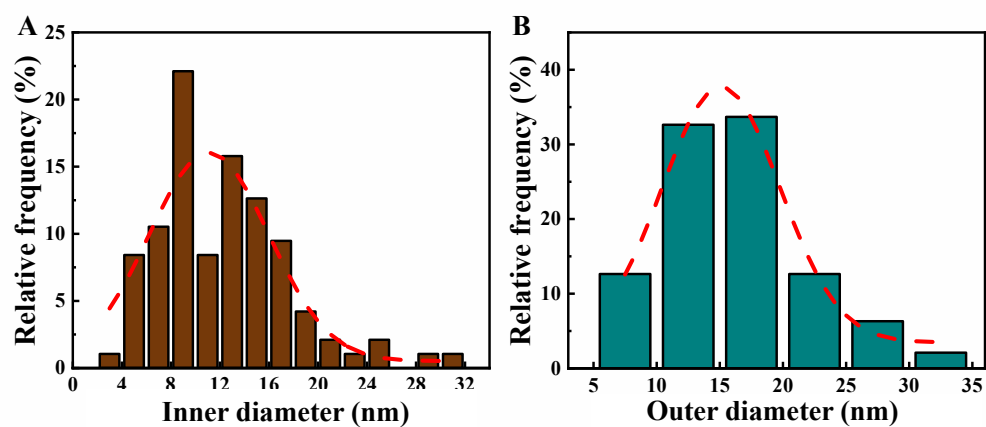

Figure S1. Histogram showing the inner (A) and outer (B) diameter size of the OCNPs.
